# Supplementary material for: Impact of a wastewater treatment plant on microbial community composition and function in a hyporheic zone of a eutrophic river
Source: PubMed Central journal article supplement (PMC4660315; doi:10.1038/srep17284), 2015-11-26
Supplement: srep17284-s1.pdf [file srep17284-s1.pdf]

# **Supplementary Information**

## **Impact of a wastewater treatment plant on microbial community composition and function in a hyporheic zone of a eutrophic river**

Siavash Atashgahi, Rozelin Aydin, Mauricio R. Dimitrov, Detmer Sipkema, Kelly Hamonts, Leo Lahti, Farai Maphosa, Thomas Kruse, Edoardo Saccenti, Dirk Springael, Winnie Dejonghe & Hauke Smidt

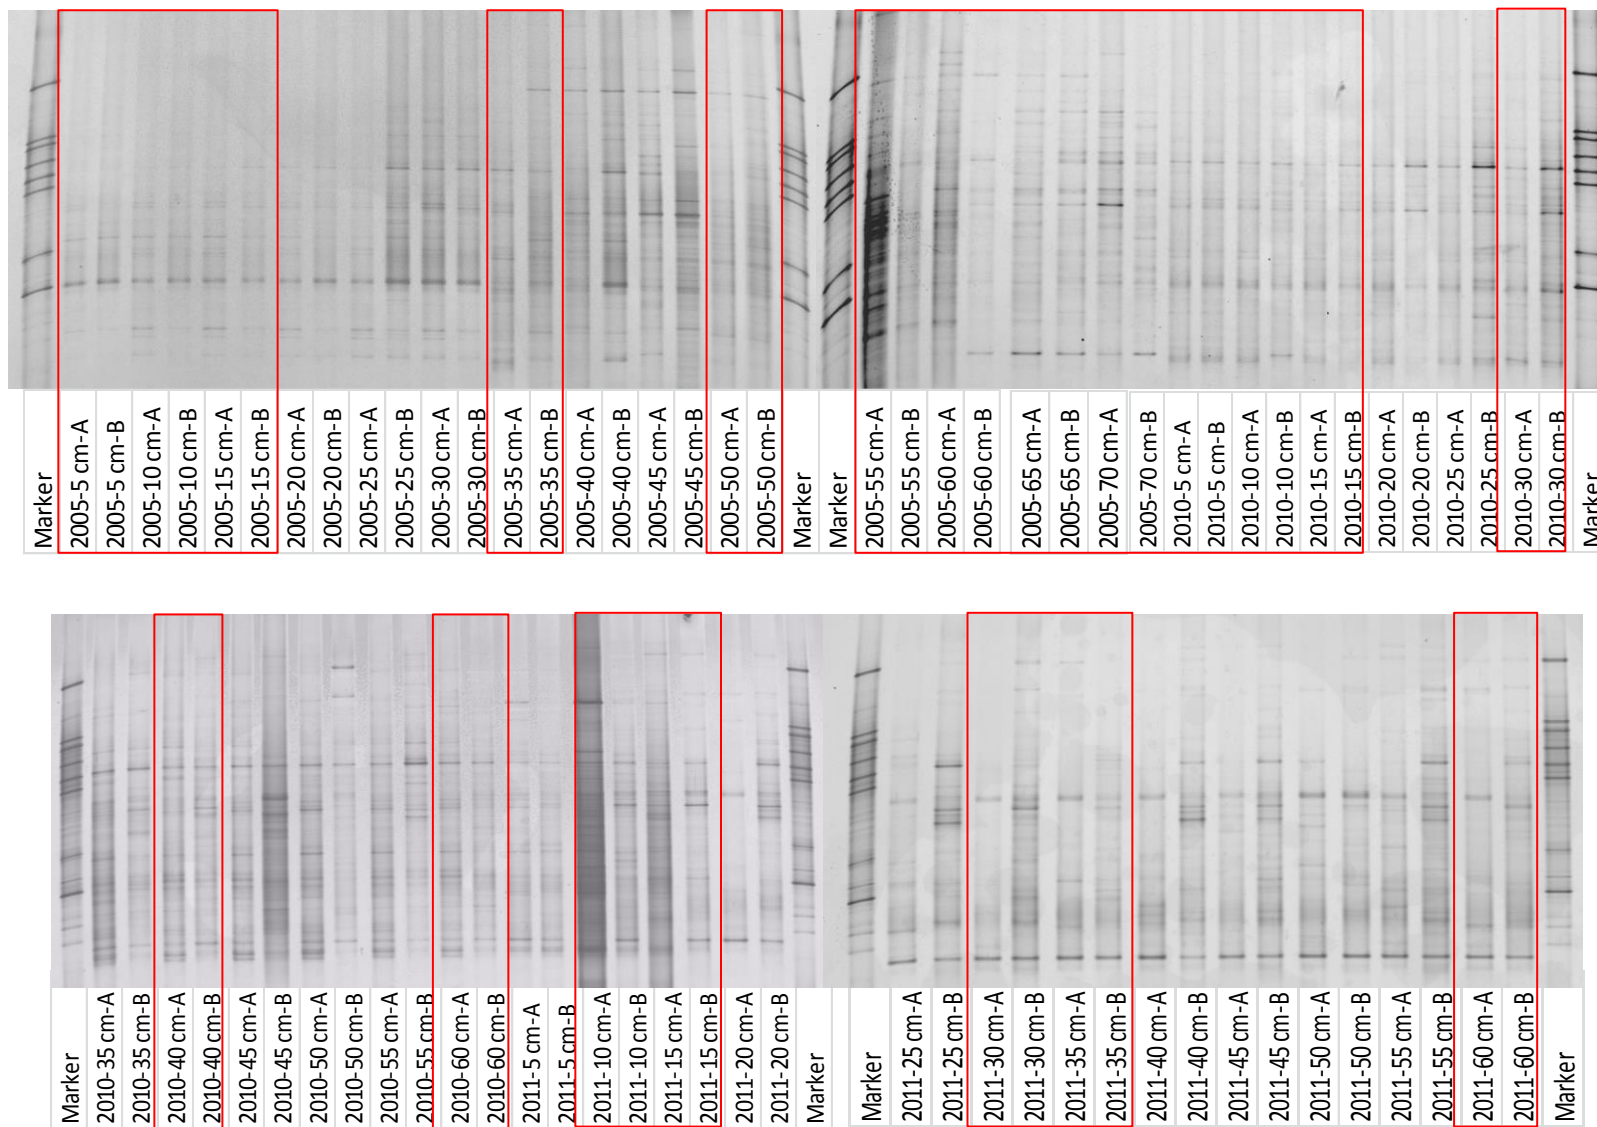

Figure S1. DGGE profiles obtained from each 5 cm interval of the duplicate sediment cores from 2005, 2010 and 2011. The samples used for further molecular analysis are shown in red boxes.

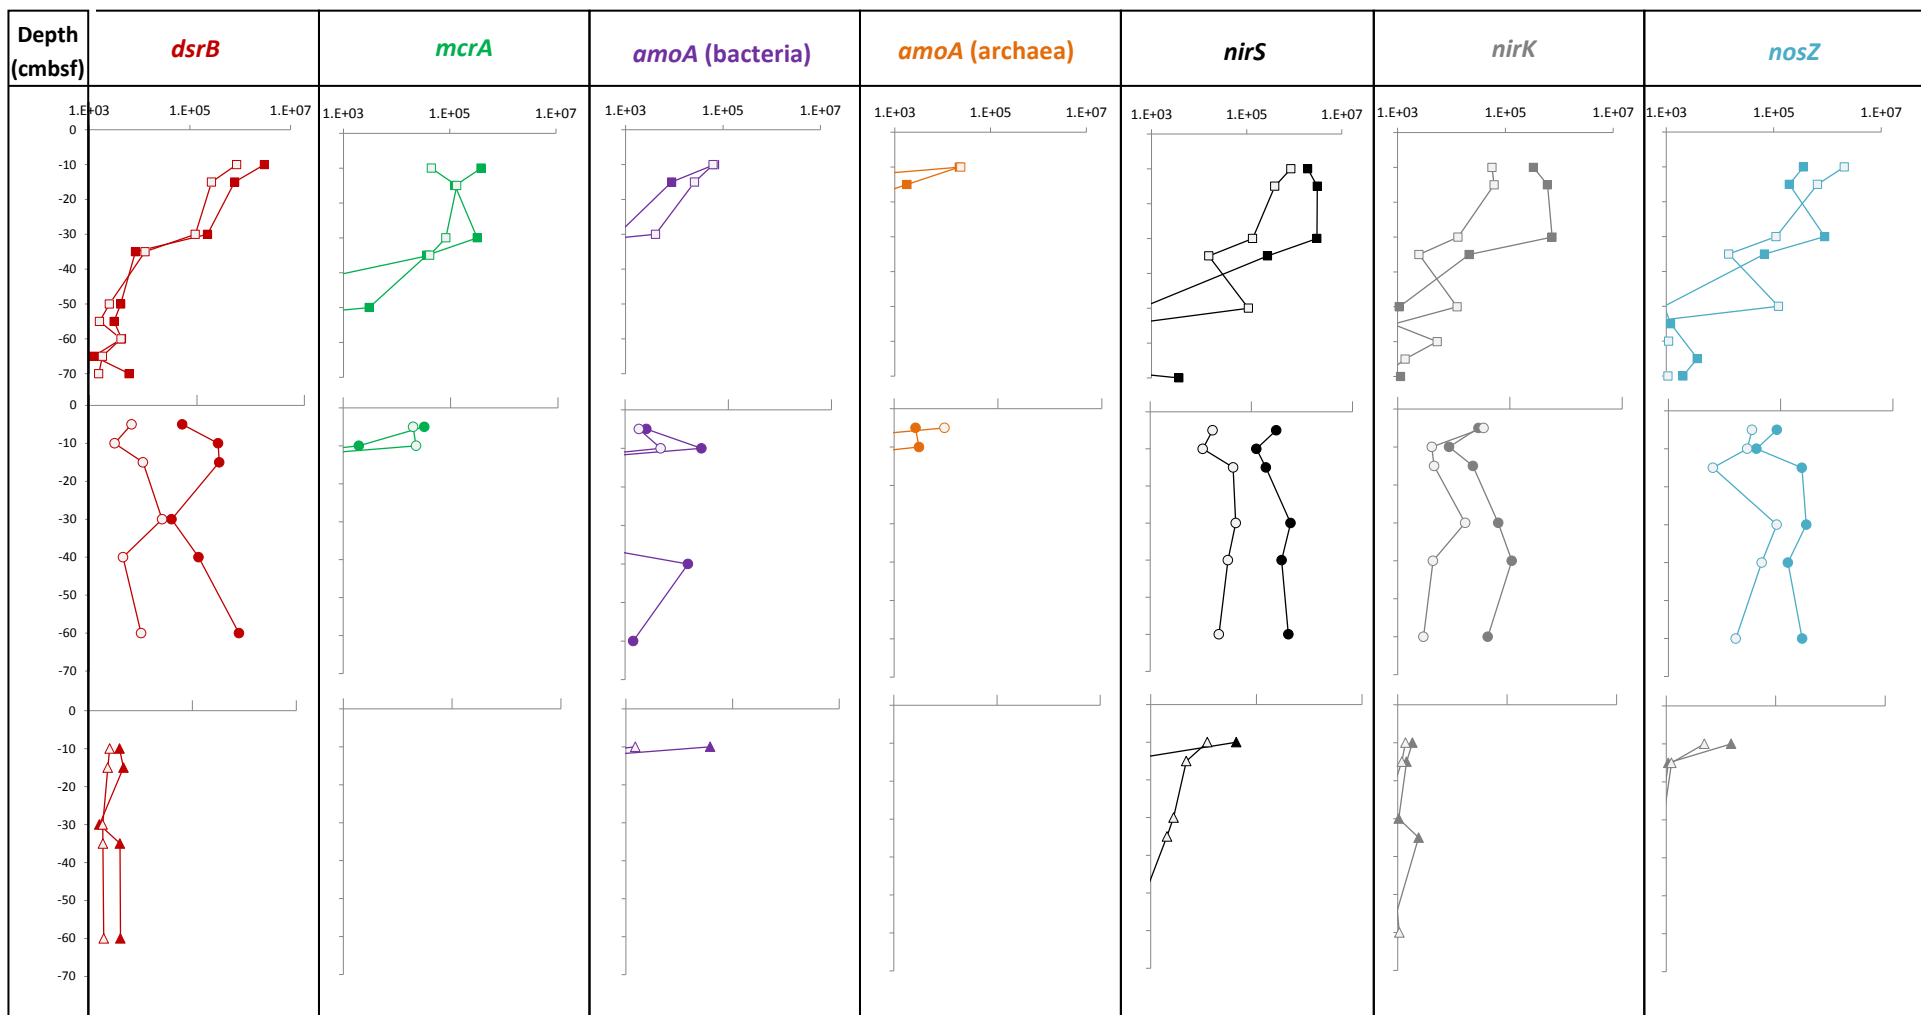

Figure S2. Copy numbers of sulphate reducers (*dsrB*) and methanogens (*mcrA*, *amoA* (bacteria), *amoA* (archaea), *nirS*, *nirK*, and *nosZ*) genes at different depths in the duplicate sediment core samples taken in 2005, 2010 and 2011, as determined by qPCR. Each value represents the average value obtained from triplicate qPCRs performed on one sample.

## Core-A

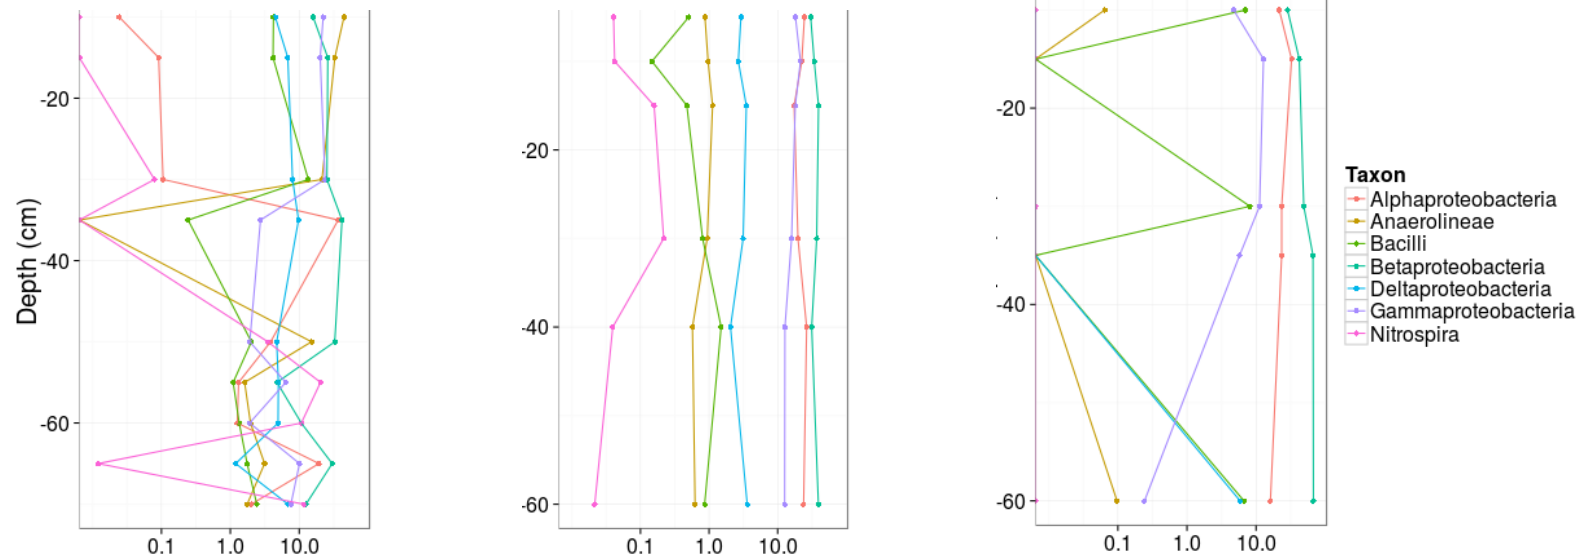

## Core-B

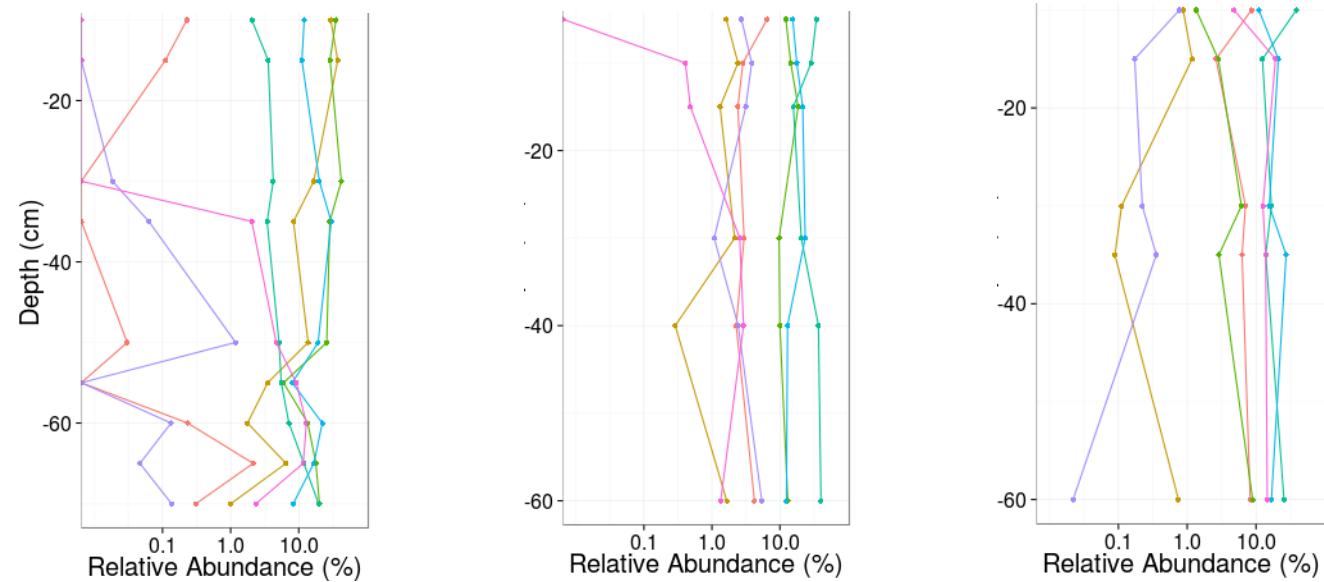

Figure S3. Log-scale relative of the dominant bacterial classes at different depths in the duplicate sediment core samples taken in 2005 (right), 2010 (middle) and 2011 (left).

## Core-A

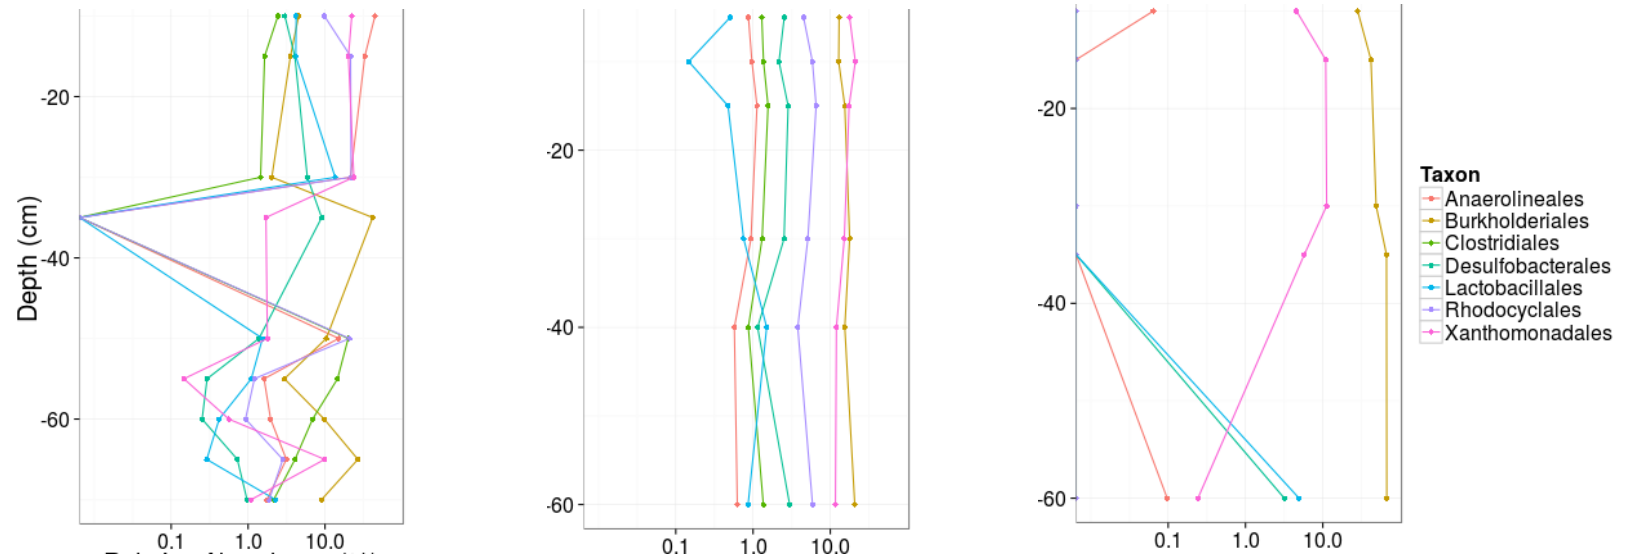

## Core-B

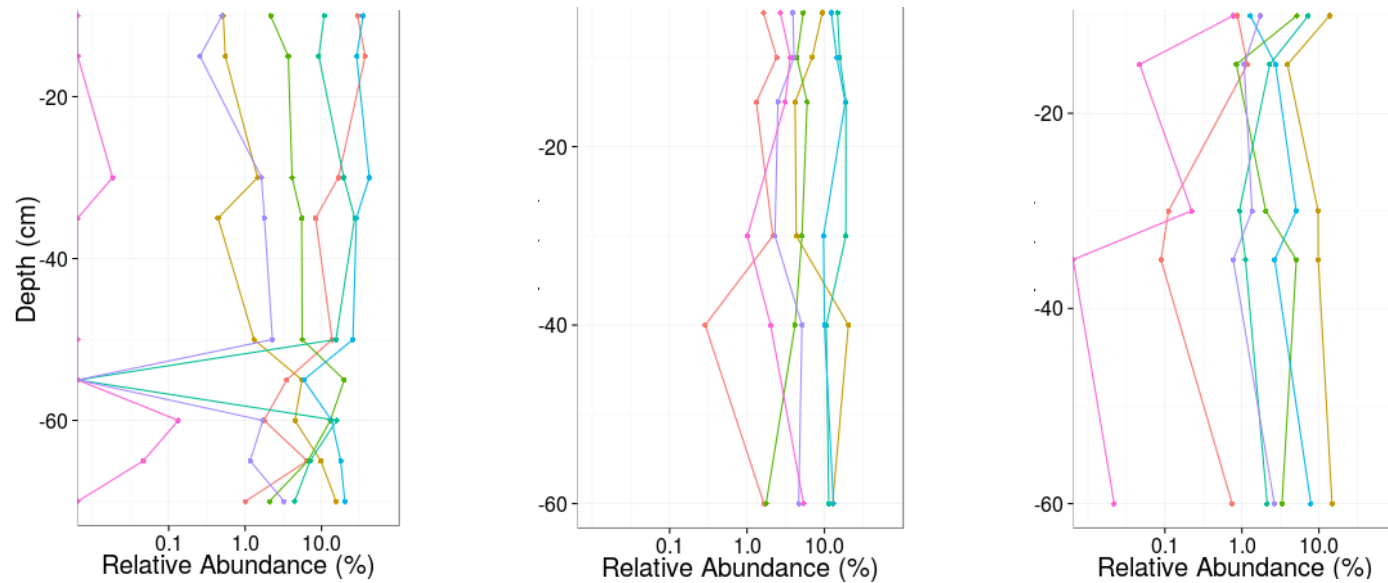

Figure S4. Log-scale relative of the dominant bacterial orders at different depths in the duplicate sediment core samples taken in 2005 (right), 2010 (middle) and 2011 (left).

Table S1. Overview of primer sequences and thermal cycling conditions used for qPCR in this study.

| Primer                       | Oligonucleotide sequence (5'-3')                 | Thermal profile                                                  | Number of cycles | Target                 | Reference |
|------------------------------|--------------------------------------------------|------------------------------------------------------------------|------------------|------------------------|-----------|
| 341F<br>534R                 | CCTACGGGAGGCAGCAG<br>ATTACCGCGGCTGCTGGC          | 95 °C 10 min<br>95 °C 15 s, 60 °C 30 s, 72 °C 30 s               | 1<br>40          | Bacteria               | 1         |
| Dco728F<br>Dco944R           | AAGGCGGTTTTCTAGGTTGTCAC<br>CTTCATGCATGTCAAAT     | 95 °C 10 min<br>95 °C 15 s, 50 °C 30 s, 72 °C 30 s               | 1<br>40          | <i>D. mccartyi</i>     | 2         |
| dsrP2060F<br>DSR4R           | CAACATCGTYCAYACCCAGGG<br>GTATAGCAGTTACCGCA       | 95 °C 15 min<br>95 °C 30 s, 55 °C 45 s, 72 °C 30 s               | 1<br>40          | <i>dsrB</i>            | 3         |
| ME1 fwd<br>ME3 rev           | GCMATGCARATHGGWATGTC<br>TGTGTGAAWCCKACDCCACC     | 95 °C 15 min<br>94 °C 10 s, 54 °C 20 s, 72 °C 30 s               | 1<br>40          | <i>mcrA</i>            | 4         |
| Bact amoA-1F<br>Bact amoA-2R | GGGGTTTCTACTGGTGGT<br>CCCCTCKGSAAGCCTTCTTC       | 50 °C 2 min, 95 °C 10 min<br>95 °C 30 s, 58 °C 40 s, 72 °C 1 min | 1<br>45          | <i>amoA</i> (bacteria) | 5         |
| Arch amoAF<br>Arch amoAR     | STAATGGTCTGGCTTAGACG<br>GCGCCATCCATCTGTATGT      | 50 °C 2 min, 95 °C 10 min<br>95 °C 30 s, 56 °C 40 s, 72 °C 1 min | 1<br>45          | <i>amoA</i> (archaea)  | 5         |
| nirSCd3aF<br>nirSR3cd        | AACGYSAAGGARACSSG<br>GASTTCGGRTGSGTCTTSAYGAA     | 95 °C 10 min<br>95°C 15 s, 56°C 30 s, 72°C 30 s                  | 1<br>40          | <i>nirS</i>            | 6<br>7    |
| nirK876<br>nirK1040          | ATYGGCGGVCAYGCGCA<br>GCCTCGATCAGRTTRTGGTT        | 95 °C 10 min<br>95°C 15 s, 60°C 30 s, 72°C 30 s                  | 1<br>40          | <i>nirK</i>            | 8         |
| nosZ2F<br>nosZ2R             | CGCRACGGCAASAAGGTSMSSTG<br>CAKRTGCAKSGCRTGGCAGAA | 95 °C 10 min<br>95°C 30 s, 60°C 30 s, 72°C 30 s                  | 1<br>40          | <i>nosZ</i>            | 9         |

Table S2. Oligonucleotide primers and sequence adapters used for pyrosequencing in this study.

| Primer <sup>a</sup> | Oligonucleotide sequence (5'-3') <sup>b</sup> | Reference                |
|---------------------|-----------------------------------------------|--------------------------|
| Adaptor A           | CCATCTCATCCCTGCGTGTCTCCGACTCAG                | Provided by GATC-Biotech |
| Adaptor B           | CCTATCCCCTGTGTGCCTTGCCAGTCTCAG                | Provided by GATC-Biotech |
| 27F-DegS            | GTTYGATYMTGGCTCAG                             | <sup>10</sup>            |
| 338R-I              | GCWGCCTCCCGTAGGAGT                            | <sup>11</sup>            |
| 338R-II             | GCWGCCACCCGTAGGTGT                            | <sup>11</sup>            |
| 27F                 | AGAGTTTGATCCTGGCTCAG                          | <sup>12</sup>            |
| 1492R               | GGTTACCTTGTACGACTT                            | <sup>12</sup>            |

<sup>a</sup> Primer names may not correspond to original publication

<sup>b</sup> M = A or C; R = A or G; W = A or T; Y = C or T

Table S3. Spearman correlation ( $\rho$ ) and associated q-values of environmental parameters in surface water during the experimental period and Kruskal-Wallis test q-values for comparison between the pre- and post-WWTP parameters.

| Variable                        | $\rho$ | q-value | Kruskal-Wallis q-value |
|---------------------------------|--------|---------|------------------------|
| PO <sub>4</sub>                 | -0.257 | 0.768   | 1.077                  |
| SO <sub>4</sub>                 | -0.224 | 0.768   | 0.237                  |
| NO <sub>2</sub>                 | -1.000 | 1.000   | NA <sup>a</sup>        |
| NO <sub>3</sub>                 | 0.036  | 1.000   | 0.558                  |
| Cl                              | -0.432 | 0.497   | 0.333                  |
| Fe                              | -0.703 | 0.142   | 0.378                  |
| Na                              | -0.286 | 0.768   | 0.312                  |
| Mg                              | -0.357 | 0.768   | 0.444                  |
| K                               | -0.500 | 0.533   | 0.312                  |
| DOC                             | -0.893 | 0.090   | 0.237                  |
| O <sub>2</sub>                  | 0.709  | 0.090   | 0.200                  |
| Temp                            | 0.161  | 0.768   | 0.912                  |
| pH                              | -0.661 | 0.090   | 0.327                  |
| Cond                            | -0.524 | 0.235   | 0.234                  |
| <sup>a</sup> NA: not applicable |        |         |                        |



Table S4. Characteristics of duplicate sediment cores taken in 2005, 2010 and 2011 including total organic carbon (TOC) and total nitrogen (TN) content, 16S rRNA gene copy numbers of bacteria and *D. mccartyi* (as measured by qPCR). Each qPCR value represents the average and standard deviation obtained from triplicate reactions.

| Core samples | TOC (%) |        | TN (%) |        | Bacteria |                 |          |         | <i>D. mccartyi</i> |         |          |         |
|--------------|---------|--------|--------|--------|----------|-----------------|----------|---------|--------------------|---------|----------|---------|
|              | Core-A  | Core-B | Core-A | Core-B | Core-A   |                 | Core-B   |         | Core-A             |         | Core-B   |         |
|              |         |        |        |        | Copies/g | SD <sup>a</sup> | Copies/g | SD      | Copies/g           | SD      | Copies/g | SD      |
| 2005.10cm    | 1.569   | 2.274  | 0.043  | 0.074  | 1.3E+08  | 1.2E+07         | 3.3E+07  | 4.3E+06 | 1.2E+03            | 4.1E+02 | 7.2E+04  | 1.9E+04 |
| 2005.15cm    | 0.852   | 2.904  | 0.025  | 0.086  | 1.7E+08  | 4.4E+06         | 9.3E+06  | 2.1E+05 | 2.6E+03            | 6.9E+02 | 2.1E+04  | 6.2E+03 |
| 2005.30cm    | 0.210   | 0.479  | 0.000  | 0.000  | 1.1E+07  | 8.8E+06         | 2.6E+06  | 4.5E+05 | 2.6E+04            | 3.0E+03 | 7.1E+03  | 1.2E+03 |
| 2005.35cm    | 0.968   | 0.453  | 0.045  | 0.014  | 6.3E+05  | 3.8E+05         | 3.4E+05  | 1.7E+04 | 1.8E+02            | 7.0E+01 | 7.7E+02  | 5.6E+02 |
| 2005.50cm    | 0.655   | 0.318  | 0.000  | 0.010  | 1.6E+05  | 1.4E+05         | 2.8E+04  | 4.6E+03 | 0                  | 0       | 7.6E+02  | 4.4E+01 |
| 2005.55cm    | 0.108   | 0.153  | 0.006  | 0.000  | 1.9E+05  | 1.8E+05         | 1.1E+04  | 8.7E+02 | 2.4E+02            | 5.2E+01 | 0        | 0       |
| 2005.60cm    | 0.132   | 0.114  | 0.000  | 0.000  | 1.2E+05  | 1.2E+05         | 4.1E+04  | 1.4E+04 | 0                  | 0       | 8.3E+02  | 6.1E+02 |
| 2005.65cm    | 0.198   | 0.198  | 0.000  | 0.006  | 3.8E+05  | 5.4E+04         | 3.9E+04  | 8.1E+03 | 0                  | 0       | 0        | 0       |
| 2005.70cm    | 0.212   | 0.099  | 0.002  | 0.000  | 6.4E+05  | 7.4E+05         | 2.8E+04  | 4.3E+03 | 5.9E+02            | 3.7E+02 | 0        | 0       |
| 2010.5cm     | 0.426   | 0.429  | 0.027  | 0.000  | 4.8E+06  | 1.5E+06         | 8.4E+05  | 2.5E+05 | 7.0E+02            | 3.0E+02 | 7.8E+02  | 0       |
| 2010.10cm    | 0.382   | 0.296  | 0.014  | 0.007  | 3.7E+07  | 2.4E+06         | 2.0E+05  | 6.8E+03 | 2.6E+03            | 3.2E+02 | 0        | 0       |
| 2010.15cm    | 0.118   | 0.394  | 0.004  | 0.000  | 4.8E+05  | 5.5E+04         | 7.6E+05  | 2.3E+05 | 0                  | 0       | 2.0E+02  | 0       |
| 2010.30cm    | 0.067   | 0.229  | 0.006  | 0.000  | 4.5E+05  | 3.0E+04         | 1.0E+06  | 8.7E+05 | 1.0E+02            | 8.1E+01 | 2.6E+02  | 0       |
| 2010.40cm    | 0.122   | 0.204  | 0.000  | 0.007  | 5.6E+06  | 4.7E+06         | 7.1E+05  | 4.9E+05 | 4.0E+02            | 4.3E+02 | 2.0E+02  | 0       |
| 2010.60cm    | 0.140   | 0.109  | 0.002  | 0.000  | 5.5E+07  | 9.3E+06         | 4.0E+05  | 8.4E+04 | 5.5E+02            | 2.2E+02 | 5.9E+02  | 4.7E+02 |
| 2011.10cm    | 0.162   | 0.196  | 0.006  | 0.000  | 5.0E+04  | 2.6E+03         | 2.1E+05  | 1.9E+05 | 0                  | 0       | 0        | 0       |
| 2011.15cm    | 0.054   | 0.285  | 0.002  | 0.007  | 1.2E+05  | 1.1E+05         | 1.3E+05  | 1.2E+04 | 3.1E+02            | 2.5E+01 | 1.9E+02  | 0       |
| 2011.30cm    | 0.132   | 0.282  | 0.000  | 0.000  | 7.3E+04  | 2.2E+04         | 8.5E+04  | 3.2E+04 | 0                  | 0       | 0        | 0       |
| 2011.35cm    | 0.089   | 0.244  | 0.004  | 0.000  | 6.8E+03  | 2.0E+03         | 4.2E+04  | 3.8E+04 | 0                  | 0       | 0        | 0       |
| 2011.60cm    | 0.048   | 0.283  | 0.002  | 0.009  | 2.1E+04  | 4.9E+03         | 4.0E+04  | 2.5E+04 | 0                  | 0       | 0        | 0       |

<sup>a</sup> SD: Standard deviation

Table S5. Spearman correlation ( $\rho$ ) and associated q-values of evolution of TOC, TN, and 16S rRNA gene copy numbers of bacteria and *D. mccartyi* over sediment depth.

| Cores  | TOC    |         | TN     |         | Bacteria |         | <i>D. mccartyi</i> |         |
|--------|--------|---------|--------|---------|----------|---------|--------------------|---------|
|        | $\rho$ | q-value | $\rho$ | q-value | $\rho$   | q-value | $\rho$             | q-value |
| 2005-A | -0.690 | 0.185   | -0.496 | 0.349   | -0.617   | 0.245   | -0.593             | 0.245   |
| 2010-A | -0.828 | 0.291   | -0.886 | 0.185   | 0.314    | 0.796   | -0.371             | 0.750   |
| 2011-A | -0.894 | 0.245   | -0.200 | 0.873   | -0.600   | 0.610   | -0.354             | 0.873   |
| 2005-B | -0.937 | 0.015   | -0.670 | 0.193   | -0.717   | 0.185   | -0.865             | 0.063   |
| 2010-B | -0.883 | 0.185   | -0.101 | 0.904   | 0.486    | 0.610   | 0.029              | 0.983   |
| 2011-B | 0.289  | 0.873   | 0.447  | 0.750   | -0.200   | 0.873   | -0.354             | 0.873   |

Table S6. Kruskal-Wallis test q-values for comparison between the pre- and post-WWTP parameters in sediment cores at top (0-20 cm) and bottom (20-70 cm) sediment horizons.

| Variables              | q-value sediment horizons |                 |
|------------------------|---------------------------|-----------------|
|                        | Top                       | Bottom          |
| TOC                    | 0.011                     | 0.321           |
| TN                     | 0.011                     | 1.000           |
| Bacteria               | 0.011                     | 0.067           |
| <i>D. mccartyi</i>     | 0.011                     | 1.000           |
| <i>dsrB</i>            | 0.009                     | 0.157           |
| <i>mcrA</i>            | 0.009                     | 0.208           |
| <i>amoA</i> (bacteria) | 0.030                     | 0.384           |
| <i>amoA</i> (archaea)  | 0.100                     | NA <sup>a</sup> |
| <i>nirS</i>            | 0.007                     | 0.026           |
| <i>nirK</i>            | 0.007                     | 0.026           |
| <i>nosZ</i>            | 0.007                     | 0.026           |

<sup>a</sup> NA: not applicable

Table S7. Copy numbers of *dsrB* (sulphate reducers), *mcrA* (methanogens) and bacterial and archaeal *amoA* genes at different depths in the duplicate sediment core samples taken in 2005, 2010 and 2011, as determined by qPCR. Each value represents the average value obtained from triplicate qPCRs performed on one sample.

| Core samples | <i>dsrB</i> |                 |          |         | <i>mcrA</i> |         |          |         | <i>amoA</i> (bacteria) |         |          |         | <i>amoA</i> (archaea) |         |          |         |
|--------------|-------------|-----------------|----------|---------|-------------|---------|----------|---------|------------------------|---------|----------|---------|-----------------------|---------|----------|---------|
|              | Core-A      |                 | Core-B   |         | Core-A      |         | Core-B   |         | Core-A                 |         | Core-B   |         | Core-A                |         | Core-B   |         |
|              | Copies/g    | SD <sup>a</sup> | Copies/g | SD      | Copies/g    | SD      | Copies/g | SD      | Copies/g               | SD      | Copies/g | SD      | Copies/g              | SD      | Copies/g | SD      |
| 2005.10cm    | 3.0E+06     | 6.8E+05         | 8.5E+05  | 2.9E+05 | 3.9E+05     | 1.8E+04 | 4.5E+04  | 3.1E+03 | 6.9E+03                | 2.8E+03 | 2.6E+03  | 1.2E+02 | 2.3E+03               | 1.0E+02 | 4.0E+03  | 1.5E+03 |
| 2005.15cm    | 6.8E+06     | 6.7E+05         | 2.7E+05  | 1.1E+05 | 1.3E+05     | 2.8E+04 | 1.4E+05  | 2.7E+04 | 8.8E+03                | 1.7E+03 | 2.6E+04  | 3.0E+03 | 1.8E+03               | 6.3E+02 | 0        | 0       |
| 2005.30cm    | 2.2E+05     | 9.0E+04         | 1.3E+05  | 1.9E+04 | 3.3E+05     | 5.3E+04 | 8.5E+04  | 3.2E+04 | 6.9E+02                | 3.6E+02 | 4.1E+03  | 2.0E+02 | 0                     | 0       | 0        | 0       |
| 2005.35cm    | 8.3E+03     | 1.4E+03         | 1.3E+04  | 2.9E+03 | 3.7E+04     | 4.6E+04 | 4.2E+04  | 3.8E+04 | 0                      | 0       | 0        | 0       | 0                     | 0       | 0        | 0       |
| 2005.50cm    | 4.2E+03     | 6.4E+02         | 2.5E+03  | 2.9E+03 | 3.1E+03     | 2.4E+03 | 0        | 0       | 0                      | 0       | 0        | 0       | 0                     | 0       | 0        | 0       |
| 2005.55cm    | 3.1E+03     | 1.6E+03         | 1.6E+03  | 3.1E+02 | 0           | 0       | 0        | 0       | 0                      | 0       | 0        | 0       | 0                     | 0       | 0        | 0       |
| 2005.60cm    | 4.4E+03     | 2.4E+03         | 4.3E+03  | 2.8E+03 | 0           | 0       | 0        | 0       | 0                      | 0       | 0        | 0       | 0                     | 0       | 0        | 0       |
| 2005.65cm    | 1.2E+03     | 1.1E+03         | 1.8E+03  | 7.2E+02 | 0           | 0       | 0        | 0       | 0                      | 0       | 0        | 0       | 0                     | 0       | 0        | 0       |
| 2005.70cm    | 6.2E+03     | 2.1E+03         | 1.5E+03  | 4.1E+02 | 0           | 0       | 0        | 0       | 0                      | 0       | 0        | 0       | 0                     | 0       | 0        | 0       |
| 2010.5cm     | 5.3E+04     | 3.8E+03         | 6.1E+03  | 4.5E+03 | 3.2E+04     | 3.6E+04 | 2.0E+04  | 1.2E+03 | 2.6E+03                | 1.2E+03 | 1.9E+03  | 1.1E+03 | 2.6E+03               | 1.2E+03 | 9.3E+03  | 2.8E+02 |
| 2010.10cm    | 2.5E+05     | 3.9E+05         | 2.9E+03  | 1.2E+03 | 2.0E+03     | 1.7E+03 | 2.3E+04  | 4.5E+03 | 3.0E+04                | 5.7E+03 | 4.9E+03  | 1.3E+03 | 3.0E+04               | 5.7E+03 | 0        | 0       |
| 2010.15cm    | 2.6E+05     | 4.5E+04         | 9.9E+03  | 1.3E+03 | 0           | 0       | 0        | 0       | 0                      | 0       | 0        | 0       | 0                     | 0       | 0        | 0       |
| 2010.30cm    | 3.4E+04     | 3.7E+03         | 2.3E+04  | 1.6E+04 | 0           | 0       | 0        | 0       | 0                      | 0       | 0        | 0       | 0                     | 0       | 0        | 0       |
| 2010.40cm    | 1.1E+05     | 1.1E+04         | 4.2E+03  | 1.4E+03 | 0           | 0       | 0        | 0       | 1.7E+04                | 2.3E+03 | 0        | 0       | 0                     | 0       | 0        | 0       |
| 2010.60cm    | 6.0E+05     | 1.3E+05         | 9.1E+03  | 8.7E+03 | 0           | 0       | 0        | 0       | 1.4E+03                | 9.4E+02 | 0        | 0       | 0                     | 0       | 0        | 0       |
| 2011.10cm    | 4.0E+03     | 1.9E+03         | 2.6E+03  | 5.4E+02 | 0           | 0       | 0        | 0       | 3.8E+04                | 2.7E+03 | 1.5E+03  | 1.0E+02 | 0                     | 0       | 0        | 0       |
| 2011.15cm    | 4.7E+03     | 1.3E+03         | 2.4E+03  | 1.3E+03 | 0           | 0       | 0        | 0       | 0                      | 0       | 0        | 0       | 0                     | 0       | 0        | 0       |
| 2011.30cm    | 1.6E+03     | 7.0E+02         | 1.9E+03  | 3.1E+02 | 0           | 0       | 0        | 0       | 0                      | 0       | 0        | 0       | 0                     | 0       | 0        | 0       |
| 2011.35cm    | 4.0E+03     | 1.5E+03         | 1.9E+03  | 1.3E+03 | 0           | 0       | 0        | 0       | 0                      | 0       | 0        | 0       | 0                     | 0       | 0        | 0       |
| 2011.60cm    | 4.1E+03     | 9.7E+02         | 2.0E+03  | 1.1E+03 | 0           | 0       | 0        | 0       | 0                      | 0       | 0        | 0       | 0                     | 0       | 0        | 0       |

<sup>a</sup> SD: Standard deviation

Table S8. Copy numbers of *nirS*, *nirK* and *nosZ* (denitrifiers) at different depths in the duplicate sediment core samples taken in 2005, 2010 and 2011, as determined by qPCR. Each value represents the average value obtained from triplicate qPCRs performed on one sample.

| Core samples | <i>nirS</i> |                 |          |         | <i>nirK</i> |         |          |         | <i>nosZ</i> |         |          |         |
|--------------|-------------|-----------------|----------|---------|-------------|---------|----------|---------|-------------|---------|----------|---------|
|              | Core-A      |                 | Core-B   |         | Core-A      |         | Core-B   |         | Core-A      |         | Core-B   |         |
|              | Copies/g    | SD <sup>a</sup> | Copies/g | SD      | Copies/g    | SD      | Copies/g | SD      | Copies/g    | SD      | Copies/g | SD      |
| 2005.10cm    | 1.9E+06     | 1.6E+05         | 8.5E+05  | 9.2E+04 | 3.3E+05     | 9.5E+04 | 5.6E+04  | 2.1E+04 | 3.6E+05     | 5.6E+04 | 2.1E+06  | 7.9E+04 |
| 2005.15cm    | 3.1E+06     | 6.9E+05         | 3.9E+05  | 3.1E+04 | 6.0E+05     | 1.3E+05 | 6.2E+04  | 1.4E+04 | 2.0E+05     | 1.0E+05 | 6.5E+05  | 5.5E+04 |
| 2005.30cm    | 3.0E+06     | 2.4E+05         | 1.3E+05  | 2.1E+04 | 7.3E+05     | 6.0E+04 | 1.3E+04  | 9.8E+02 | 8.9E+05     | 1.0E+05 | 1.1E+05  | 2.4E+03 |
| 2005.35cm    | 2.7E+05     | 6.5E+04         | 1.6E+04  | 5.1E+02 | 2.1E+04     | 3.7E+03 | 2.5E+03  | 1.7E+03 | 6.7E+04     | 8.1E+03 | 1.5E+04  | 3.3E+03 |
| 2005.50cm    | 5.7E+02     | 1.6E+02         | 1.1E+05  | 2.4E+03 | 1.1E+03     | 1.5E+02 | 1.3E+04  | 7.2E+02 | 9.1E+02     | 6.9E+02 | 1.2E+05  | 2.1E+04 |
| 2005.55cm    | 8.2E+02     | 6.1E+02         | 1.8E+02  | 1.1E+02 | 8.1E+02     | 1.0E+03 | 8.3E+02  | 5.2E+02 | 1.2E+03     | 9.8E+01 | 2.2E+02  | 1.0E+02 |
| 2005.60cm    | 0           | 0               | 1.5E+02  | 2.8E+00 | 0           | 0       | 5.4E+03  | 4.3E+03 | 0           | 0       | 1.1E+03  | 8.1E+02 |
| 2005.65cm    | 0           | 0               | 3.8E+02  | 4.3E+02 | 0           | 0       | 1.4E+03  | 1.4E+03 | 3.8E+03     | 1.1E+03 | 6.8E+02  | 1.5E+02 |
| 2005.70cm    | 3.8E+03     | 1.1E+03         | 2.5E+02  | 2.8E+02 | 1.1E+03     | 5.1E+01 | 5.2E+02  | 4.6E+01 | 2.0E+03     | 5.5E+02 | 1.1E+03  | 1.4E+03 |
| 2010.5cm     | 3.1E+05     | 5.0E+04         | 1.7E+04  | 2.4E+03 | 2.8E+04     | 3.5E+02 | 3.4E+04  | 8.3E+02 | 8.6E+04     | 1.4E+04 | 3.1E+04  | 5.4E+03 |
| 2010.10cm    | 1.3E+05     | 6.7E+03         | 1.1E+04  | 3.7E+02 | 8.3E+03     | 1.3E+03 | 4.1E+03  | 9.1E+02 | 3.7E+04     | 8.4E+03 | 2.5E+04  | 6.4E+03 |
| 2010.15cm    | 1.9E+05     | 9.1E+03         | 4.4E+04  | 4.9E+02 | 2.2E+04     | 2.1E+03 | 4.5E+03  | 3.2E+01 | 2.4E+05     | 7.0E+04 | 6.2E+03  | 4.3E+01 |
| 2010.30cm    | 6.0E+05     | 2.9E+04         | 4.9E+04  | 1.0E+04 | 6.2E+04     | 3.6E+02 | 1.6E+04  | 1.4E+04 | 2.9E+05     | 9.7E+04 | 8.5E+04  | 5.5E+04 |
| 2010.40cm    | 4.0E+05     | 5.0E+05         | 3.4E+04  | 9.1E+02 | 1.1E+05     | 1.1E+05 | 4.3E+03  | 8.7E+02 | 1.4E+05     | 1.1E+05 | 4.6E+04  | 1.5E+04 |
| 2010.60cm    | 5.4E+05     | 4.9E+04         | 2.3E+04  | 5.6E+03 | 4.0E+04     | 3.3E+03 | 2.9E+03  | 2.1E+03 | 2.4E+05     | 1.5E+03 | 1.6E+04  | 2.7E+03 |
| 2011.10cm    | 4.2E+04     | 2.4E+03         | 1.2E+04  | 1.4E+03 | 1.9E+03     | 8.5E+02 | 1.4E+03  | 1.4E+03 | 1.5E+04     | 3.4E+03 | 5.0E+03  | 1.3E+03 |
| 2011.15cm    | 2.5E+02     | 5.8E+01         | 4.7E+03  | 2.1E+03 | 1.5E+03     | 6.0E+02 | 1.2E+03  | 6.5E+02 | 1.1E+03     | 5.9E+02 | 1.3E+03  | 1.0E+03 |
| 2011.30cm    | 8.5E+02     | 4.4E+02         | 2.7E+03  | 9.3E+02 | 1.0E+03     | 1.7E+02 | 5.3E+02  | 4.5E+02 | 7.8E+02     | 7.2E+02 | 8.9E+02  | 2.2E+02 |
| 2011.35cm    | 3.1E+02     | 3.3E+01         | 2.0E+03  | 4.2E+02 | 2.4E+03     | 1.3E+03 | 7.2E+02  | 2.4E+02 | 1.4E+02     | 6.8E+01 | 2.2E+02  | 8.2E+01 |
| 2011.60cm    | 4.4E+02     | 7.2E+01         | 4.3E+02  | 5.9E+01 | 7.5E+02     | 7.2E+02 | 1.1E+03  | 6.1E+00 | 1.1E+02     | 1.4E+01 | 0        | 0       |

<sup>a</sup> SD: Standard deviation

Table S9. Number of reads per sample.

| Core samples | Reads | Core samples | Reads |
|--------------|-------|--------------|-------|
| 2005.10cm.a  | 4337  | 2005.10cm.b  | 5407  |
| 2005.15cm.a  | 4677  | 2005.15cm.b  | 6083  |
| 2005.30cm.a  | 4162  | 2005.30cm.b  | 6053  |
| 2005.35cm.a  | 11510 | 2005.35cm.b  | 5419  |
| 2005.50cm.a  | 5430  | 2005.50cm.b  | 4037  |
| 2005.55cm.a  | 3570  | 2005.55cm.b  | 967   |
| 2005.60cm.a  | 4536  | 2005.60cm.b  | 4152  |
| 2005.65cm.a  | 11820 | 2005.65cm.b  | 5611  |
| 2005.70cm.a  | 4488  | 2005.70cm.b  | 6890  |
| 2010.10cm.a  | 6640  | 2010.10cm.b  | 5014  |
| 2010.15cm.a  | 7824  | 2010.15cm.b  | 4068  |
| 2010.30cm.a  | 8269  | 2010.30cm.b  | 1854  |
| 2010.40cm.a  | 7688  | 2010.40cm.b  | 4152  |
| 2010.5cm.a   | 6714  | 2010.5cm.b   | 4489  |
| 2010.60cm.a  | 7138  | 2010.60cm.b  | 3537  |
| 2011.10cm.a  | 20335 | 2011.10cm.b  | 6700  |
| 2011.15cm.a  | 16547 | 2011.15cm.b  | 8126  |
| 2011.30cm.a  | 8325  | 2011.30cm.b  | 8222  |
| 2011.35cm.a  | 8989  | 2011.35cm.b  | 9086  |
| 2011.60cm.a  | 8682  | 2011.60cm.b  | 7862  |

Table S10. Taxa that significantly changed over time between pre- and post-WWTP sediment core samples. The taxa are ordered by the effect size, according to a linear regression model where logarithmic relative abundance is predicted based on the core type, year (2005, 2010, and 2011), and depth (10, 15, 30, and 60 cm depths where complete data was available) as fixed effects. The effect size indicates how much the sampling year affects the log abundance according to the model. A small constant (the minimum of the non-zero values) was added to the relative abundances to avoid singularities on zero abundances in taking the logarithm. The analysis was performed with R <sup>13</sup>.

| Level  | Taxon                    | q-value | Effect size |
|--------|--------------------------|---------|-------------|
| Phylum | <i>Chloroflexi</i>       | 0.00061 | -0.24705    |
| Phylum | <i>Nitrospirae</i>       | 0.22936 | 0.11436     |
| Phylum | <i>Firmicutes</i>        | 0.04272 | -0.11413    |
| Phylum | <i>Proteobacteria</i>    | 0.00001 | 0.05176     |
| Order  | <i>Anaerolineales</i>    | 0.00002 | -0.30582    |
| Order  | <i>Lactobacillales</i>   | 0.00594 | -0.19897    |
| Order  | <i>Clostridiales</i>     | 0.02586 | -0.17292    |
| Order  | <i>Burkholderiales</i>   | 0.00000 | 0.15111     |
| Order  | <i>Rhodocyclales</i>     | 0.17111 | -0.14196    |
| Order  | <i>Desulfobacterales</i> | 0.08725 | -0.13968    |
| Order  | <i>Xanthomonadales</i>   | 0.19946 | 0.10104     |

Table S11. Diversity comparisons between different cores based on t-test as performed in R <sup>13</sup>. Significant difference at a q-value < 0.25 is marked as TRUE/FALSE.

| Group-1 | Group-2 | Shannon |             | Chao1   |             | OTU count |             |
|---------|---------|---------|-------------|---------|-------------|-----------|-------------|
|         |         | q-value | significant | q-value | significant | q-value   | significant |
| 2005-A  | 2005-B  | 1.000   | FALSE       | 1.0000  | FALSE       | 1.000     | FALSE       |
| 2005-A  | 2011-A  | 0.001   | TRUE        | 0.001   | TRUE        | 0.001     | TRUE        |
| 2005-A  | 2011-B  | 0.254   | FALSE       | 0.805   | FALSE       | 0.678     | FALSE       |
| 2005-A  | 2010-A  | 0.000   | TRUE        | 0.000   | TRUE        | 0.000     | TRUE        |
| 2005-A  | 2010-B  | 0.001   | TRUE        | 0.000   | TRUE        | 0.000     | TRUE        |
| 2005-B  | 2011-A  | 0.000   | TRUE        | 0.000   | TRUE        | 0.000     | TRUE        |
| 2005-B  | 2011-B  | 0.536   | FALSE       | 0.805   | FALSE       | 0.681     | FALSE       |
| 2005-B  | 2010-A  | 0.000   | TRUE        | 0.000   | TRUE        | 0.000     | TRUE        |
| 2005-B  | 2010-B  | 0.001   | TRUE        | 0.000   | TRUE        | 0.000     | TRUE        |
| 2011-A  | 2011-B  | 0.001   | TRUE        | 0.048   | TRUE        | 0.042     | TRUE        |
| 2011-A  | 2010-A  | 0.000   | TRUE        | 0.000   | TRUE        | 0.000     | TRUE        |
| 2011-A  | 2010-B  | 0.000   | TRUE        | 0.000   | TRUE        | 0.000     | TRUE        |
| 2011-B  | 2010-A  | 0.024   | TRUE        | 0.004   | TRUE        | 0.004     | TRUE        |
| 2011-B  | 2010-B  | 0.536   | FALSE       | 0.457   | FALSE       | 0.769     | FALSE       |
| 2010-A  | 2010-B  | 0.001   | TRUE        | 0.000   | TRUE        | 0.000     | TRUE        |



## References

1. Muyzer G, De Waal EC, Uitterlinden AG. Profiling of complex microbial populations by denaturing gradient gel electrophoresis analysis of polymerase chain reaction-amplified genes coding for 16S rRNA. *Appl Environ Microbiol* **59**, 695-700 (1993).
2. Smits THM, Devenoges C, Szynalski K, Maillard J, Holliger C. Development of a real-time PCR method for quantification of the three genera *Dehalobacter*, *Dehalococcoides*, and *Desulfitobacterium* in microbial communities. *J Microbiol Methods* **57**, 369-378 (2004).
3. Dar SA, Yao L, Van Dongen U, Kuenen JG, Muyzer G. Analysis of diversity and activity of sulfate-reducing bacterial communities in sulfidogenic bioreactors using 16S rRNA and *dsrB* genes as molecular markers. *Appl Environ Microbiol* **73**, 594-604 (2007).
4. Wilms R, Sass H, Köpke B, Cypionka H, Engelen B. Methane and sulfate profiles within the subsurface of a tidal flat are reflected by the distribution of sulfate-reducing bacteria and methanogenic archaea. *FEMS Microbiol Ecol* **59**, 611-621 (2007).
5. Zheng Y, *et al.* Diversity, abundance, and activity of ammonia-oxidizing bacteria and archaea in Chongming eastern intertidal sediments. *Appl Microbiol Biotechnol*, 1-13 (2012).
6. Michotey V, Méjean V, Bonin P. Comparison of methods for quantification of cytochrome *cd1*-denitrifying bacteria in environmental marine samples. *Appl Environ Microbiol* **66**, 1564-1571 (2000).
7. Throbäck IN, Enwall K, Jarvis A, Hallin S. Reassessing PCR primers targeting *nirS*, *nirK* and *nosZ* genes for community surveys of denitrifying bacteria with DGGE. *FEMS Microbiol Ecol* **49**, 401-417 (2004).
8. Henry S, Baudoin E, López-Gutiérrez JC, Martin-Laurent F, Brauman A, Philippot L. Quantification of denitrifying bacteria in soils by *nirK* gene targeted real-time PCR. *J Microbiol Methods* **59**, 327-335 (2004).
9. Henry S, Bru D, Stres B, Hallet S, Philippot L. Quantitative detection of the *nosZ* gene, encoding nitrous oxide reductase, and comparison of the abundances of 16S rRNA, *narG*, *nirK*, and *nosZ* genes in soils. *Appl Environ Microbiol* **72**, 5181-5189 (2006).
10. van den Bogert B, de Vos WM, Zoetendal EG, Kleerebezem M. Microarray analysis and barcoded pyrosequencing provide consistent microbial profiles depending on the source of human intestinal samples. *Appl Environ Microbiol* **77**, 2071-2080 (2011).
11. Daims H, Brühl A, Amann R, Schleifer KH, Wagner M. The domain-specific probe EUB338 is insufficient for the detection of all bacteria: Development and evaluation of a more comprehensive probe set. *Systematic and Applied Microbiology* **22**, 434-444 (1999).

12. Lane D. 16S/23S rRNA sequencing. In *Nucleic Acid Techniques in Bacterial Systematics*. Stackebrandt, E., and Goodfellow, M. (eds). New York, USA: Wiley, pp. 115–148., (1991).
13. R Core Team. R: A language and environment for statistical computing. (ed^(eds). R Foundation for Statistical Computing (2013).
